# Supplementary material for: Direct identification of ALK and ROS1 fusions in non-small cell lung cancer from hematoxylin and eosin-stained slides using deep learning algorithms
Source: PubMed Central journal article supplement (PMC9708557; doi:10.1038/s41379-022-01141-4), 2022-09-03
Supplement: 41379_2022_1141_MOESM1_ESM.pdf [file 41379_2022_1141_MOESM1_ESM.pdf]

# Supplementary Information

**Supplementary Table S1:** Summary of testing of validation cohort samples

| Case | ROS1 IHC      | ROS1 NGS | ROS1 NGS      | ROS1 FISH     | Offitial result | ROS1 AI  | ALK IHC       | ALK NGS | ALK NGS       | ALK FISH      | Offitial result | ALK AI   | concordance | Pathological type                                    |
|------|---------------|----------|---------------|---------------|-----------------|----------|---------------|---------|---------------|---------------|-----------------|----------|-------------|------------------------------------------------------|
| 1    | Negative      | RNA      | Negative      | Not performed | Negative        | Negative | Negative      | RNA     | Negative      | Not performed | Negative        | Negative | YES         | Lung adenocarcinoma metastasis to liver              |
| 2    | Equivocal     | RNA      | Negative      | Negative      | Negative        | Negative | Equivocal     | RNA     | Negative      | Negative      | Negative        | Negative | YES         | Lung Adenocarcinoma metastasis to Ilium              |
| 3    | Negative      | RNA      | Negative      | Not performed | Negative        | Negative | Negative      | RNA     | Negative      | Not performed | Negative        | Negative | YES         | NSCLC, Adenocarcinoma                                |
| 4    | Negative      | RNA      | Negative      | Not performed | Negative        | Negative | Negative      | RNA     | Negative      | Not performed | Negative        | Negative | YES         | M/p lung adenosquamous carcinoma metastasis to liver |
| 5    | Negative      | RNA      | Negative      | Not performed | Negative        | Negative | Negative      | RNA     | Negative      | Not performed | Negative        | Negative | YES         | NSCLC, Adenocarcinoma                                |
| 6    | Negative      | RNA      | Negative      | Not performed | Negative        | Negative | Negative      | RNA     | Negative      | Not performed | Negative        | Negative | YES         | NSCLC, Squamous cell carcinoma                       |
| 7    | Negative      | RNA      | Negative      | Not performed | Negative        | Negative | Negative      | RNA     | Negative      | Not performed | Negative        | Negative | YES         | Lung adenocarcinoma metastasis to Adrenal gland      |
| 8    | Negative      | RNA      | Negative      | Not performed | Negative        | Negative | Negative      | RNA     | Negative      | Not performed | Negative        | Negative | YES         | NSCLC, Adenocarcinoma                                |
| 9    | Not performed | RNA      | Not performed | Not performed | not tested      | Negative | Equivocal     | RNA     | Not performed | Negative      | Negative        | Negative | YES         | NSCLC, Adenocarcinoma                                |
| 10   | Negative      | RNA      | Negative      | Not performed | Negative        | Negative | Negative      | RNA     | Negative      | Not performed | Negative        | Negative | YES         | NSCLC, Adenocarcinoma                                |
| 11   | Negative      | RNA      | Negative      | Not performed | Negative        | Negative | Negative      | RNA     | Negative      | Not performed | Negative        | Negative | YES         | NSCLC, sub-type not found                            |
| 12   | Negative      | RNA      | Negative      | Not performed | Negative        | Negative | Negative      | RNA     | Negative      | Not performed | Negative        | Negative | YES         | NSCLC, sub-type not found                            |
| 13   | Negative      | RNA      | Negative      | Not performed | Negative        | Negative | Negative      | RNA     | Negative      | Not performed | Negative        | Negative | YES         | Poorly differentiated carcinoma                      |
| 14   | Negative      | RNA      | Negative      | Not performed | Negative        | Negative | Negative      | RNA     | Negative      | Not performed | Negative        | Negative | YES         | NSCLC, Adenocarcinoma                                |
| 15   | Negative      | RNA      | Negative      | Not performed | Negative        | Negative | Negative      | RNA     | Negative      | Not performed | Negative        | Negative | YES         | NSCLC, Adenocarcinoma                                |
| 16   | Negative      | RNA      | Negative      | Not performed | Negative        | Negative | Negative      | RNA     | Negative      | Not performed | Negative        | Negative | YES         | NSCLC, Squamous cell carcinoma                       |
| 17   | Negative      | RNA      | Negative      | Not performed | Negative        | Negative | Negative      | RNA     | Negative      | Not performed | Negative        | Negative | YES         | NSCLC, Adenocarcinoma metastasis to rib              |
| 18   | Negative      | RNA      | Negative      | Not performed | Negative        | Negative | Negative      | RNA     | Negative      | Not performed | Negative        | Negative | YES         | NSCLC, Adenocarcinoma                                |
| 19   | Negative      | RNA      | Negative      | Not performed | Negative        | Negative | Equivocal     | RNA     | Negative      | Negative      | Negative        | Negative | YES         | NSCLC, Adenocarcinoma                                |
| 20   | Negative      | RNA      | Negative      | Not performed | Negative        | Negative | Negative      | RNA     | Negative      | Not performed | Negative        | Negative | YES         | NSCLC, M/P Adenocarcinoma                            |
| 21   | Negative      | RNA      | Negative      | Not performed | Negative        | Negative | Negative      | RNA     | Negative      | Not performed | Negative        | Negative | YES         | NSCLC, Adenocarcinoma                                |
| 22   | Negative      | RNA      | Negative      | Not performed | Negative        | Negative | Equivocal     | RNA     | Negative      | Negative      | Negative        | Negative | YES         | NSCLC, Adenocarcinoma                                |
| 23   | Negative      | RNA      | Negative      | Not performed | Negative        | Negative | Negative      | RNA     | Negative      | Not performed | Negative        | Negative | YES         | NSCLC, Adenocarcinoma                                |
| 24   | Negative      | RNA      | Negative      | Not performed | Negative        | Negative | Negative      | RNA     | Negative      | Not performed | Negative        | Negative | YES         | NSCLC, Adenocarcinoma                                |
| 25   | Negative      | RNA      | Negative      | Not performed | Negative        | Negative | Negative      | RNA     | Negative      | Not performed | Negative        | Negative | YES         | NSCLC, Adenocarcinoma                                |
| 26   | Negative      | RNA      | Negative      | Not performed | Negative        | Negative | Negative      | RNA     | Negative      | Not performed | Negative        | Negative | YES         | NSCLC, Adenocarcinoma                                |
| 27   | Negative      | RNA      | Negative      | Not performed | Negative        | Negative | Negative      | RNA     | Negative      | Not performed | Negative        | Negative | YES         | Lung Adenocarcinoma metastasis to liver              |
| 28   | Negative      | RNA      | Negative      | Not performed | Negative        | Negative | Negative      | RNA     | Negative      | Not performed | Negative        | Negative | YES         | Metastatic Adenocarcinoma to Ilium, origin unknown   |
| 29   | Negative      | RNA      | Negative      | Not performed | Negative        | Negative | Negative      | RNA     | Negative      | Not performed | Negative        | Negative | YES         | NSCLC, Squamous cell carcinoma                       |
| 30   | Negative      | RNA      | Negative      | Not performed | Negative        | Negative | Negative      | RNA     | Negative      | Not performed | Negative        | Negative | YES         | NSCLC, Adenocarcinoma                                |
| 31   | Negative      | RNA      | Negative      | Not performed | Negative        | Negative | Negative      | RNA     | Negative      | Not performed | Negative        | Negative | YES         | NSCLC, Adenocarcinoma                                |
| 32   | Negative      | RNA      | Negative      | Not performed | Negative        | Negative | Negative      | RNA     | Negative      | Not performed | Negative        | Negative | YES         | NSCLC, Squamous cell carcinoma                       |
| 33   | Negative      | RNA      | Negative      | Not performed | Negative        | Negative | Negative      | RNA     | Negative      | Not performed | Negative        | Negative | YES         | NSCLC, Adenocarcinoma                                |
| 34   | Negative      | RNA      | Negative      | Not performed | Negative        | Negative | Negative      | RNA     | Negative      | Not performed | Negative        | Negative | YES         | NSCLC, Adenocarcinoma                                |
| 35   | Negative      | RNA      | Negative      | Not performed | Negative        | Negative | Negative      | RNA     | Negative      | Not performed | Negative        | Negative | YES         | NSCLC, Adenocarcinoma                                |
| 36   | Negative      | RNA      | Negative      | Not performed | Negative        | Negative | Negative      | RNA     | Negative      | Not performed | Negative        | Negative | YES         | NSCLC, Squamous cell carcinoma                       |
| 37   | Not performed | RNA      | Negative      | Not performed | Negative        | Negative | positive      | RNA     | positive      | Not performed | positive        | positive | YES         | Lung adenocarcinoma metastasis to portal lymph nodes |
| 38   | Negative      | RNA      | Negative      | Not performed | Negative        | Negative | Negative      | RNA     | Negative      | Not performed | Negative        | Negative | YES         | NSCLC, Squamous cell carcinoma                       |
| 39   | Negative      | RNA      | Negative      | Not performed | Negative        | Negative | Negative      | RNA     | Negative      | Not performed | Negative        | Negative | YES         | NSCLC, Adenocarcinoma                                |
| 40   | Equivocal     | NA       | Not performed | positive      | positive        | positive | Negative      | DNA     | Not performed | Not performed | Negative        | Negative | YES         | NSCLC, Adenosquamous                                 |
| 41   | Negative      | NA       | Not performed | Negative      | Negative        | Negative | Equivocal     | DNA     | Not performed | positive      | positive        | positive | YES         | NSCLC, poorly dif. Adenocarcinoma                    |
| 42   | Not performed | NA       | Not performed | positive      | positive        | positive | Negative      | DNA     | Not performed | Negative      | Negative        | Negative | YES         | NSCLC, poorly dif. Adenocarcinoma                    |
| 43   | Not performed | NA       | Not performed | Not performed | not tested      | Negative | Negative      | NA      | Not performed | positive      | positive        | positive | YES         | NSCLC, Adenocarcinoma                                |
| 44   | Not performed | NA       | Not performed | Not performed | not tested      | Negative | Not performed | NA      | Not performed | positive      | positive        | positive | YES         | NSCLC, Adenocarcinoma                                |
| 45   | Not performed | NA       | Not performed | Not performed | not tested      | Negative | Negative      | DNA     | Not performed | positive      | positive        | positive | YES         | NSCLC, Adenocarcinoma                                |
| 46   | Not performed | RNA      | Negative      | Not performed | Negative        | Negative | Not performed | RNA     | positive      | positive      | positive        | positive | YES         | NSCLC, poorly dif. Adenocarcinoma                    |
| 47   | Negative      | NA       | Not performed | Not performed | Negative        | Negative | Negative      | DNA     | Not performed | Not performed | Negative        | Negative | YES         | NSCLC, Adenocarcinoma                                |
| 48   | Negative      | NA       | Not performed | Not performed | Negative        | Negative | Negative      | DNA     | Not performed | Not performed | Negative        | Negative | YES         | NSCLC, Mucinous Adenocarcinoma                       |
| 49   | Negative      | NA       | Not performed | Not performed | Negative        | Negative | Negative      | DNA     | Not performed | Not performed | Negative        | Negative | YES         | NSCLC, Mucinous Adenocarcinoma                       |
| 50   | Negative      | NA       | Not performed | Not performed | Negative        | Negative | Negative      | DNA     | Not performed | Not performed | Negative        | Negative | YES         | NSCLC, Adenocarcinoma                                |

|    |           |     |               |               |          |          |           |     |               |               |          |          |     |                                                      |
|----|-----------|-----|---------------|---------------|----------|----------|-----------|-----|---------------|---------------|----------|----------|-----|------------------------------------------------------|
| 51 | Negative  | NA  | Not performed | Not performed | Negative | Negative | Negative  | DNA | Not performed | Not performed | Negative | Negative | YES | NSCLC, Adenocarcinoma                                |
| 52 | Negative  | NA  | Not performed | Not performed | Negative | Negative | Equivocal | DNA | Not performed | Negative      | Negative | Negative | YES | NSCLC, Adenocarcinoma                                |
| 53 | Negative  | NA  | Not performed | Not performed | Negative | Negative | Negative  | DNA | Not performed | Not performed | Negative | Negative | YES | NSCLC, Adenocarcinoma                                |
| 54 | Negative  | NA  | Not performed | Not performed | Negative | Negative | Negative  | DNA | Not performed | Not performed | Negative | Negative | YES | NSCLC, Adenocarcinoma                                |
| 55 | Negative  | NA  | Not performed | Not performed | Negative | Negative | Negative  | DNA | Not performed | Not performed | Negative | Negative | YES | NSCLC, Undifferentiated Carcinoma                    |
| 56 | Negative  | NA  | Not performed | Not performed | Negative | Negative | Negative  | DNA | Not performed | Not performed | Negative | Negative | YES | NSCLC, Adenocarcinoma                                |
| 57 | Negative  | RNA | Negative      | Negative      | Negative | positive | Negative  | RNA | Negative      | Not performed | Negative | Negative | NO  | NSCLC, Adenocarcinoma                                |
| 58 | Negative  | RNA | Negative      | Not performed | Negative | Negative | Negative  | RNA | Negative      | Not performed | Negative | Negative | YES | NSCLC, Carcinoma with NE expression                  |
| 59 | Negative  | RNA | Negative      | Not performed | Negative | Negative | Negative  | RNA | Negative      | Not performed | Negative | Negative | YES | NSCLC, Adenocarcinoma                                |
| 60 | Equivocal | NA  | FAILED        | Negative      | Negative | Negative | Negative  | DNA | FAILED        | Negative      | Negative | Negative | YES | NSCLC, Adenocarcinoma                                |
| 61 | Negative  | RNA | Negative      | Not performed | Negative | Negative | Negative  | RNA | Negative      | Not performed | Negative | Negative | YES | NSCLC, Adenocarcinoma                                |
| 62 | Negative  | RNA | Negative      | Not performed | Negative | Negative | Negative  | RNA | Negative      | Not performed | Negative | Negative | YES | NSCLC, Adenocarcinoma                                |
| 63 | Negative  | RNA | Negative      | Not performed | Negative | Negative | Negative  | RNA | Negative      | Negative      | Negative | Negative | YES | NSCLC, Adenocarcinoma with signet-ring like features |
| 64 | Negative  | NA  | FAILED        | Negative      | Negative | Negative | Negative  | DNA | FAILED        | Negative      | Negative | Negative | YES | NSCLC, Adenocarcinoma                                |
| 65 | Negative  | RNA | Negative      | Not performed | Negative | Negative | Negative  | RNA | Negative      | Not performed | Negative | Negative | YES | NSCLC, Squamous carcinoma                            |
| 66 | Negative  | RNA | Negative      | Not performed | Negative | Negative | Negative  | RNA | Negative      | Not performed | Negative | Negative | YES | NSCLC, m/p Squamous carcinoma                        |
| 67 | Negative  | RNA | Negative      | Not performed | Negative | Negative | Negative  | RNA | Negative      | Not performed | Negative | Negative | YES | NSCLC, Squamous carcinoma                            |
| 68 | Negative  | RNA | Negative      | Not performed | Negative | Negative | Negative  | RNA | Negative      | Not performed | Negative | Negative | YES | NSCLC, Adenocarcinoma                                |
| 69 | Negative  | RNA | Negative      | Not performed | Negative | Negative | Negative  | RNA | Negative      | Not performed | Negative | Negative | YES | NSCLC, m/p Squamous carcinoma                        |
| 70 | Negative  | RNA | Negative      | Not performed | Negative | Negative | Negative  | RNA | Negative      | Not performed | Negative | Negative | YES | NSCLC, Adenocarcinoma                                |
| 71 | Negative  | NA  | FAILED        | Not performed | Negative | Negative | Negative  | DNA | FAILED        | Not performed | Negative | Negative | YES | NSCLC, Adenocarcinoma                                |
| 72 | Negative  | RNA | Negative      | Not performed | Negative | Negative | Negative  | RNA | FAILED        | Not performed | Negative | Negative | YES | NSCLC, Adenocarcinoma                                |

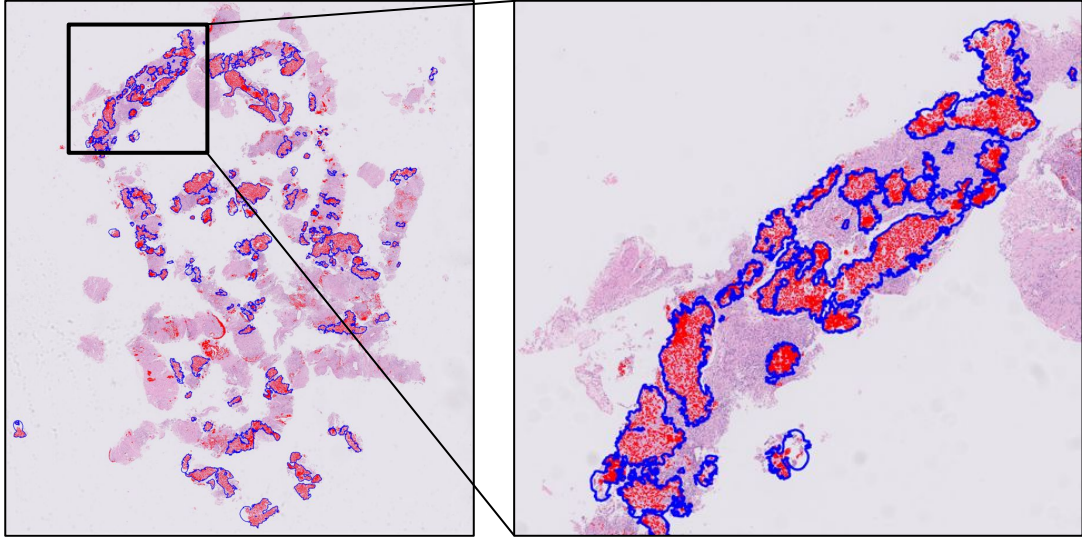

**Supplementary Figure S1. WSI showing agreement between manual annotations of cancerous regions and ROIs**

Representative H&E slide displaying ROIs in red and a pathologist's manual cancer regions annotation marked with blue line borders. High overlap can be seen between the two.

WSI - whole slide image ; ROI - region of interest

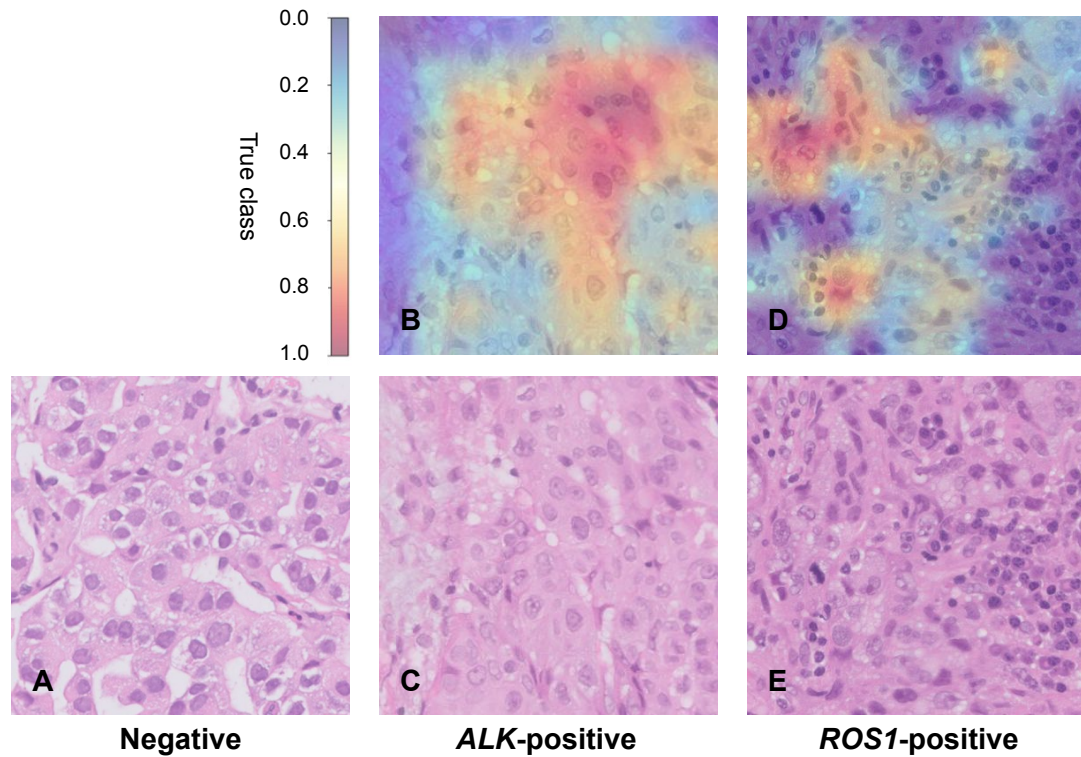

**Supplementary Figure S2. *ALK* and *ROS1* heatmaps**

Representative patches from the H&E images of a negative (A), *ALK*-positive (C) and *ROS1*-positive (E) cases, along with the matched heatmaps demarcating the regions contributed the most to the model prediction ((B) for *ALK*- and (D) for *ROS1*-positive). Size bar = 64 $\mu$ m.
